# Supplementary material for: Nano-enzyme hydrogels for cartilage repair effectiveness based on ternary strategy therapy
Source: Royal Society of Chemistry journal article supplement (doi:10.1039/d4tb00307a), 2024-01-01
Supplement: d4tb00307a1.pdf [file d4tb00307a1.pdf]

Updated: 05 June 2024

## ***Supporting Information***

### **Nano-enzymatic Hydrogel for Cartilage Repair Effectiveness Based on Ternary Strategy Therapy**

Wei Deng<sup>1,3,#</sup>, Yue Zhou<sup>4,#</sup>, Qinlin Wan<sup>6</sup>, Lei Li<sup>2</sup>, Hui Deng<sup>5</sup>, Yong Yin<sup>3</sup>, Qingsong Zhou<sup>3</sup>, Qiujiang Li<sup>1</sup>, Duo Cheng<sup>3</sup>, Xuefeng Hu<sup>5</sup>, Yunbing Wang<sup>2,\*</sup> & Ganjun Feng<sup>1,\*</sup>

<sup>1</sup>Department of Orthopedics Surgery and Orthopedic Research Institute, West China Hospital, Sichuan University, Chengdu 610041, China

<sup>2</sup>National Engineering Research Center for Biomaterials & College of Biomedical Engineering, Sichuan University, Chengdu, Sichuan, 610065, China

<sup>3</sup>Department of Orthopedics, Pidu District People's Hospital, The Third Affiliated Hospital of Chengdu Medical College, Chengdu, 611730, China

<sup>4</sup>Department of Emergency Medicine, West China Hospital, Sichuan University, Chengdu, 610041, China

<sup>5</sup>West China School of Basic Medical Sciences & Forensic Medicine, Sichuan University, Chengdu, Sichuan, 610041, China

<sup>6</sup>Medical College of Soochow University, Suzhou, 215123, China

#These authors contributed equally to this work.

\*Corresponding author at. 29 Wangjiang Road, Chengdu, China, 610065

Tel: +86 028 85410537; Fax: +86 028 85410246

E-mail addresses: [yunbing.wang@scu.edu.cn](mailto:yunbing.wang@scu.edu.cn)(Y. Wang)

\*Corresponding author. 17 Gaopeng Avenue, Chengdu, China, 610041

Fax: +86-028-85423438; Tel: +86-028-85422570

E-mail addresses: [gjfenghx@163.com](mailto:gjfenghx@163.com)(G. Feng)



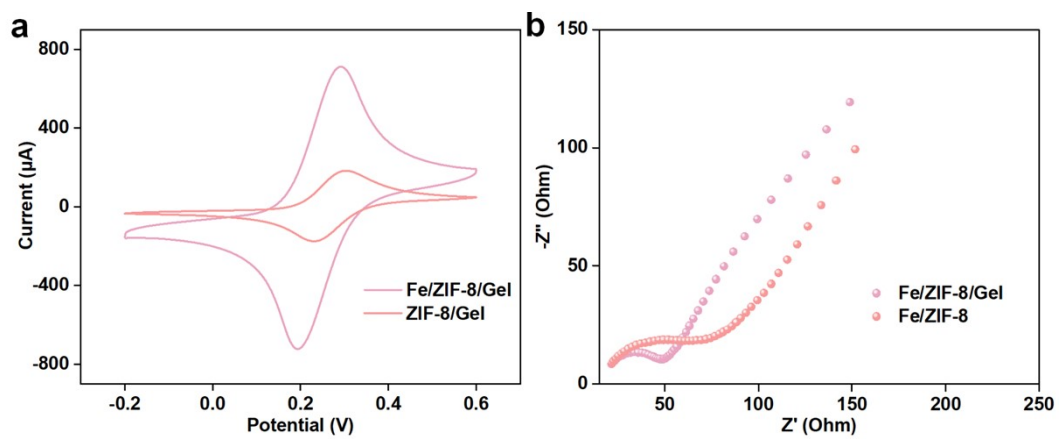

**Fig. S1.** (a) The CV and (b) the EIS of different types of modified electrodes in 5.0 mM  $[\text{Fe}(\text{CN})_6]^{3-/4-}$  solution contains 0.1 M KCl.

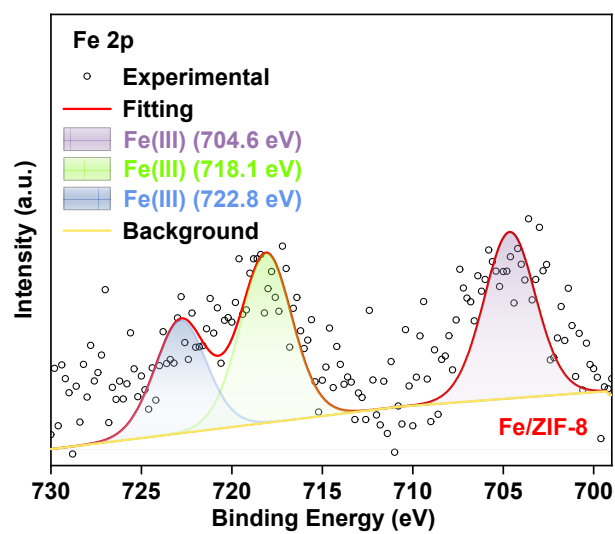

**Fig. S2.** The high-resolution XPS image of Fe 2p of Fe/ZIF-8.

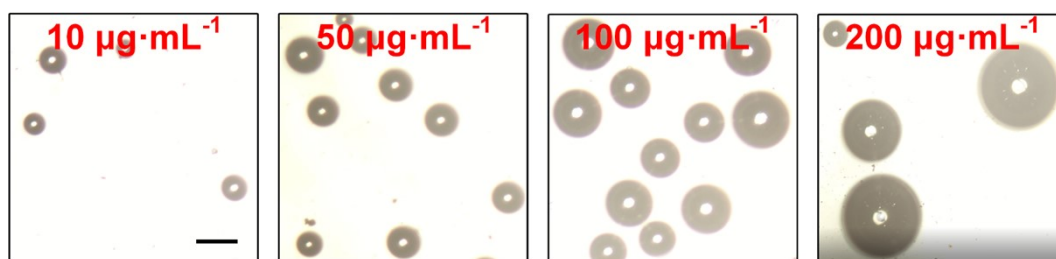

**Fig. S3.** The optical images of O<sub>2</sub> bubble production were observed when H<sub>2</sub>O<sub>2</sub> (25 mM) was catalyzed by different concentrations of Fe/ZIF-8/Gel nano-enzymatic hydrogels for 30 s in acidic PBS (pH 6.5). (Scale bar: 200 µm).

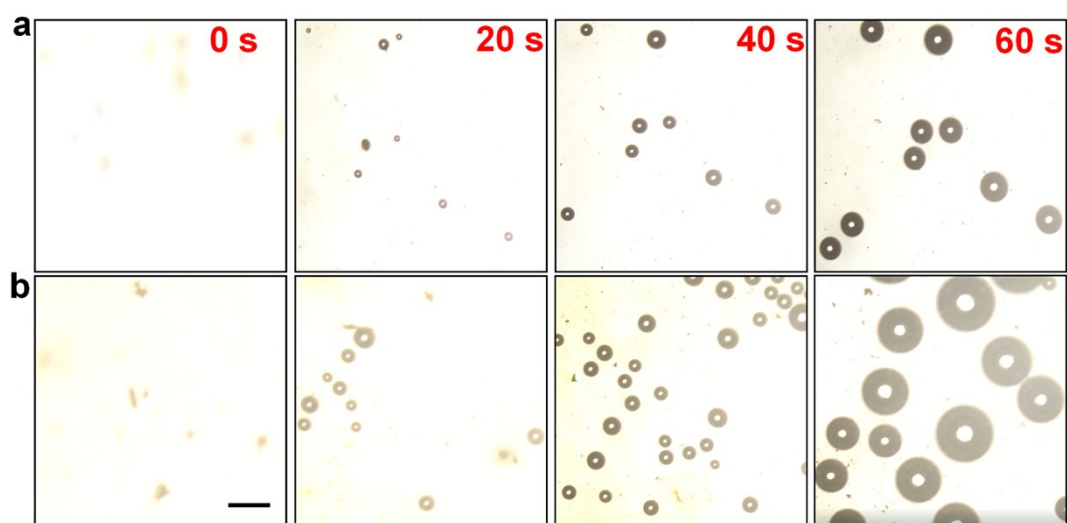

**Fig. S4.** The O<sub>2</sub> bubbles produced by Fe/ZIF-8/Gel and ZIF-8/Gel nano-enzymatic hydrogels catalyze H<sub>2</sub>O<sub>2</sub> (25 mM) as observed by optical microscopy (0.01 M PBS, pH=6.5). (Scale bar: 100 μm).

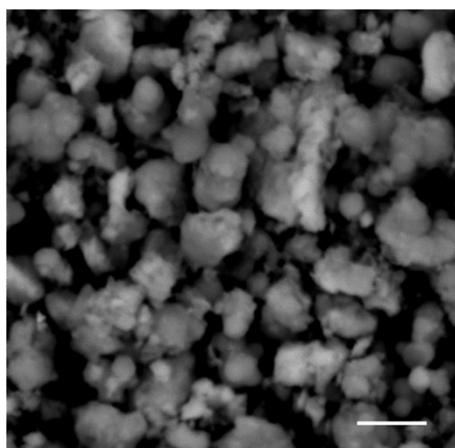

**Fig. S5.** The SEM image of Fe-MOF. (Scale bar: 2  $\mu\text{m}$ ).

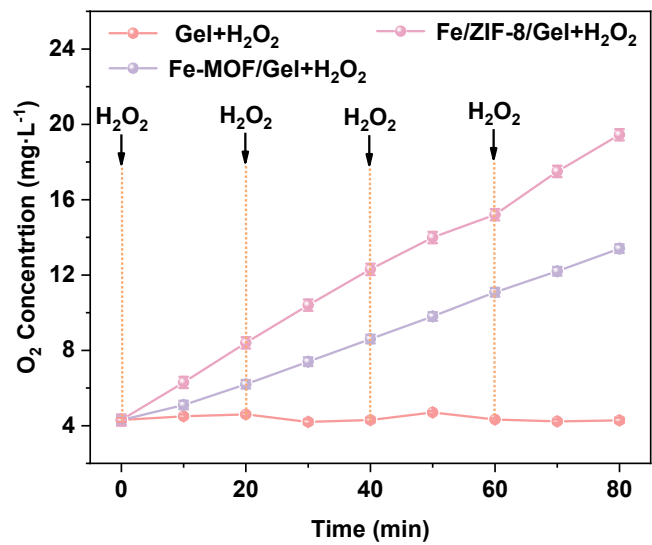

**Fig. S6.** Continuous catalytic O<sub>2</sub> generation ability of Gel, Fe-MOF/Gel, and Fe/ZIF-8/Gel nano-enzyme hydrogel with a repetitive addition of H<sub>2</sub>O<sub>2</sub> (0.1 mM).



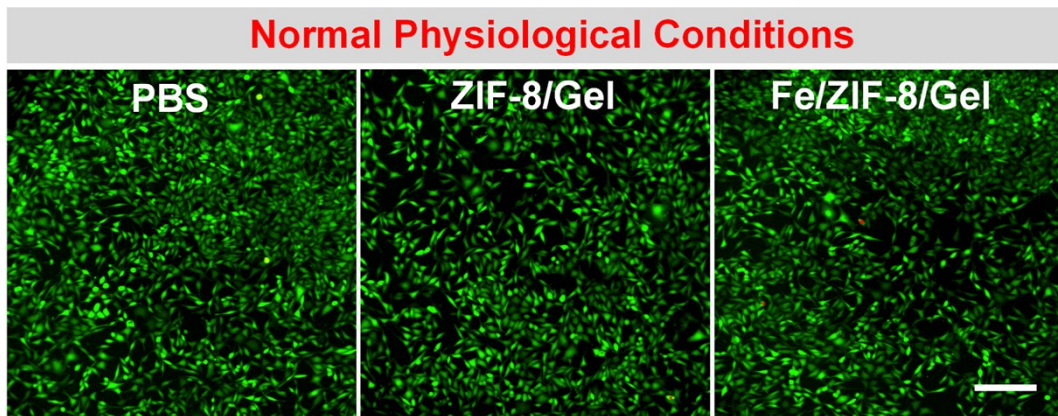

**Fig. S7.** The Fluorescence images of CHO cells stained with Calcein-AM/PI after being treated with PBS, ZIF-8/Gel, and Fe/ZIF-8/Gel. A representative image of three replicates from each group is shown. (Scale bar: 200  $\mu\text{m}$ ).

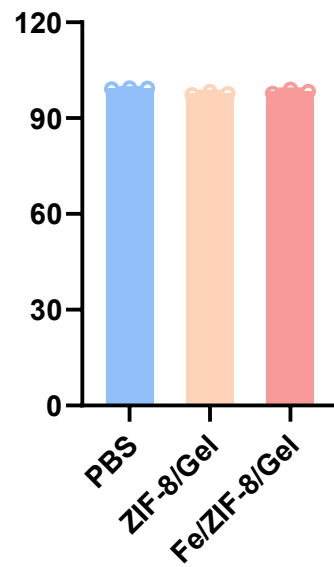

**Fig. S8.** The quantitative analysis of CHO survival after being treated with ZIF-8/Gel, and Fe/ZIF-8/Gel. Data are presented as mean values  $\pm$  SD (n = 3).

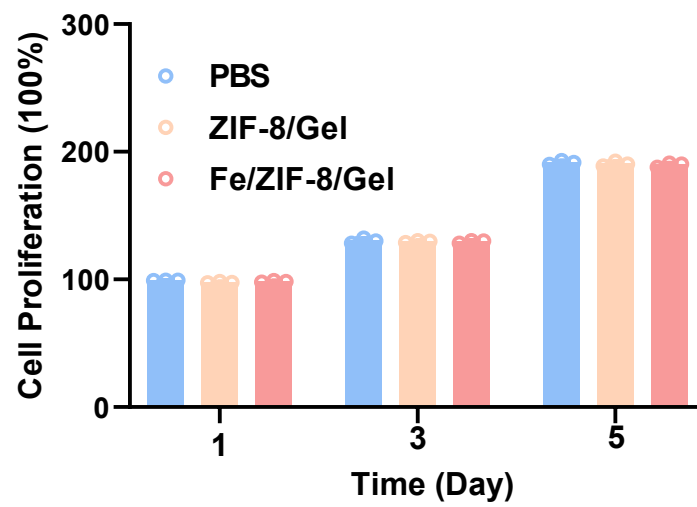

**Fig. S9.** The quantitative analysis of CHO survival after being treated with ZIF-8/Gel, and Fe/ZIF-8/Gel. Data are presented as mean values  $\pm$  SD (n = 3).

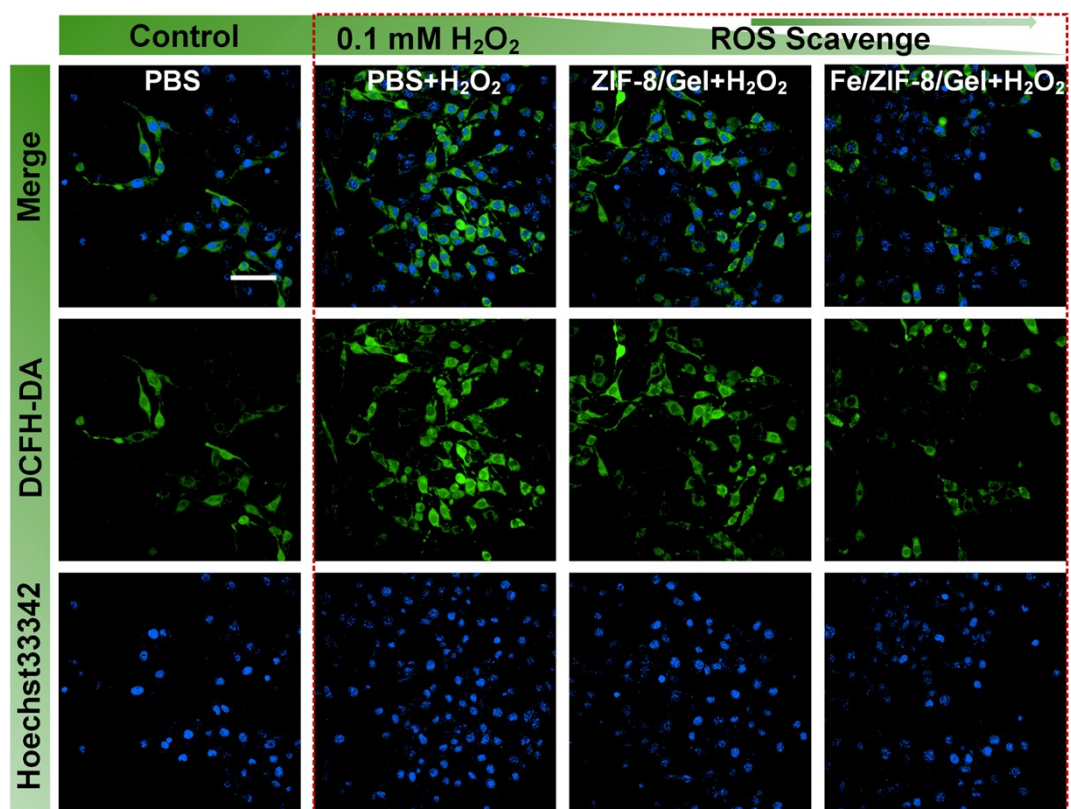

**Fig. S10.** The ROS scavenge ability was validated by a ROS probe (DCFH-DA) after different treatments. Green fluorescence from DCFH-DA indicates the presence of ROS. (Scale bar: 50  $\mu$ m).

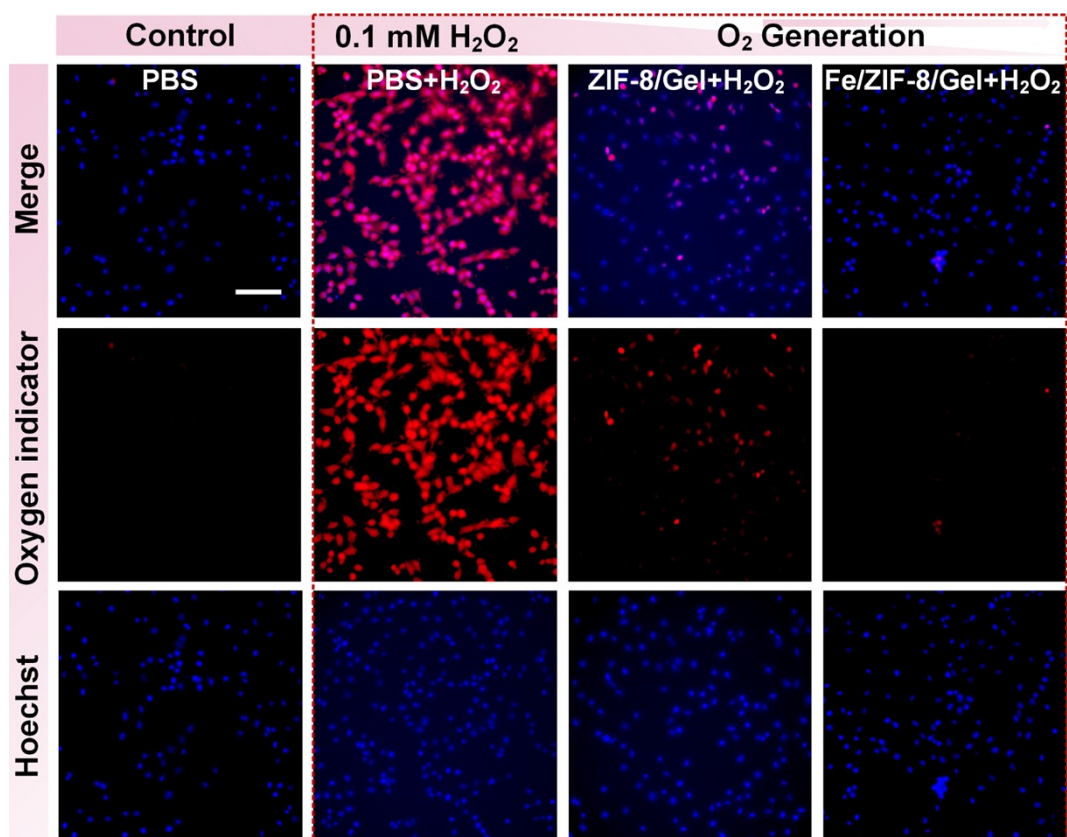

**Fig. S11.** Intracellular O<sub>2</sub>-generation assay monitored by an O<sub>2</sub> probe [Ru(dpp)<sub>3</sub>Cl<sub>2</sub>]. Red fluorescence from Ru(dpp)<sub>3</sub>Cl<sub>2</sub> is quenched by O<sub>2</sub>. (Scale bar: 100 μm).

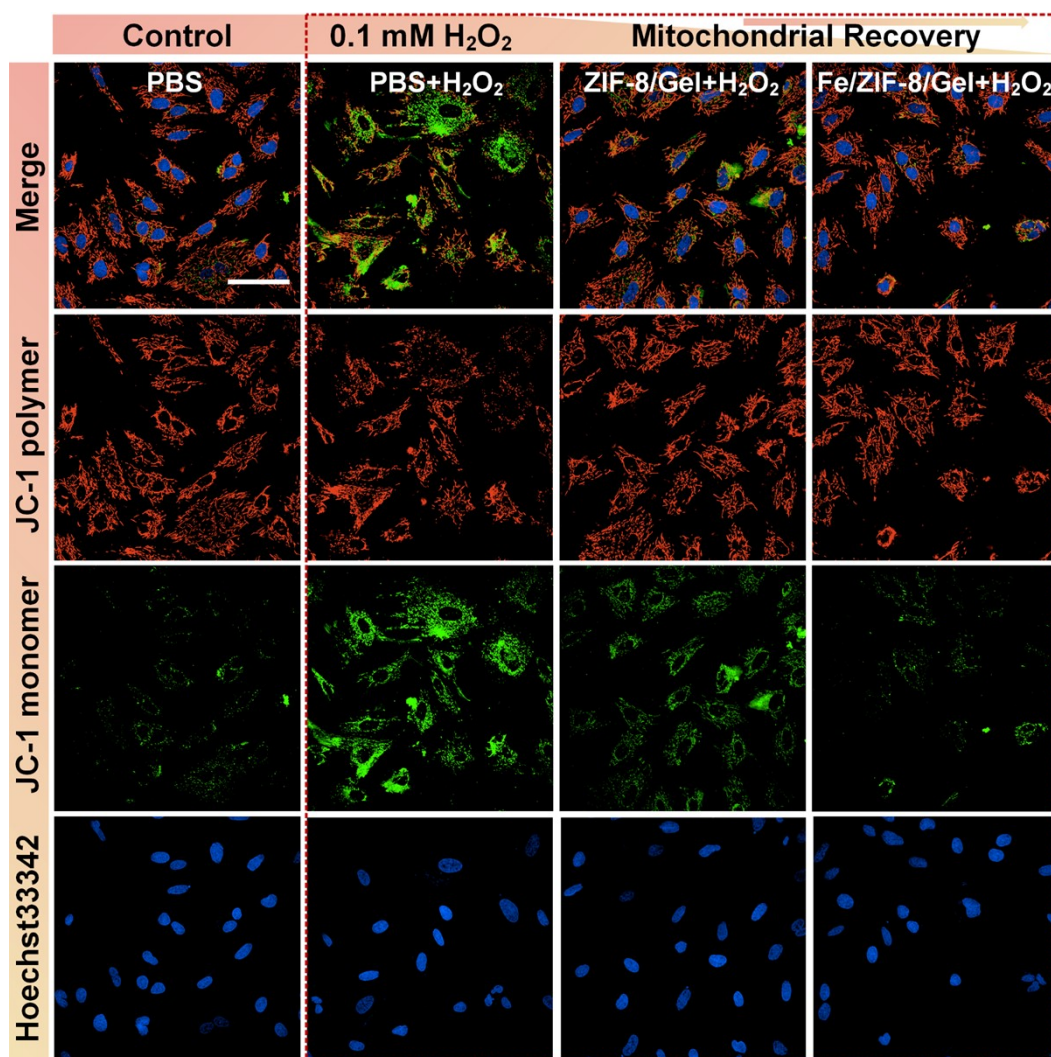

**Fig. S12.** The JC-1 probe verified mitochondria's membrane potential recovery ability after different treatments. JC-1 emitted green fluorescence to indicate the membrane damage of mitochondria. (Scale bar: 20  $\mu$ m).

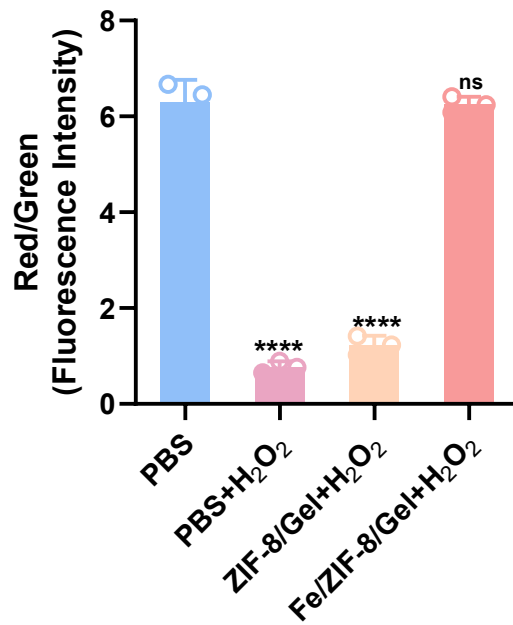

**Fig. S13.** The quantitative analysis of mitochondrial  $\Delta\psi_m$  in different treatment groups. Data are presented as mean values  $\pm$  SD (n = 3).

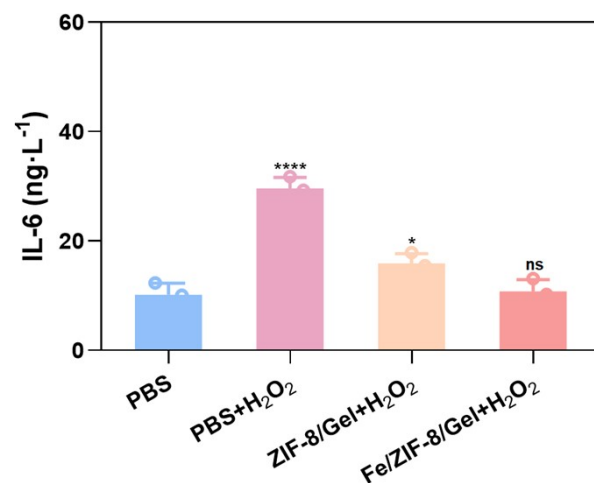

**Fig. S14.** Expression of IL-6 inflammatory mediators in CHO cells after different treatment groups. The Fe/ZIF-8/Gel nano-enzyme hydrogel concentration was  $100 \mu\text{g}\cdot\text{mL}^{-1}$  in all experiments. These data are presented as mean values  $\pm$  SD ( $n = 3$ ).



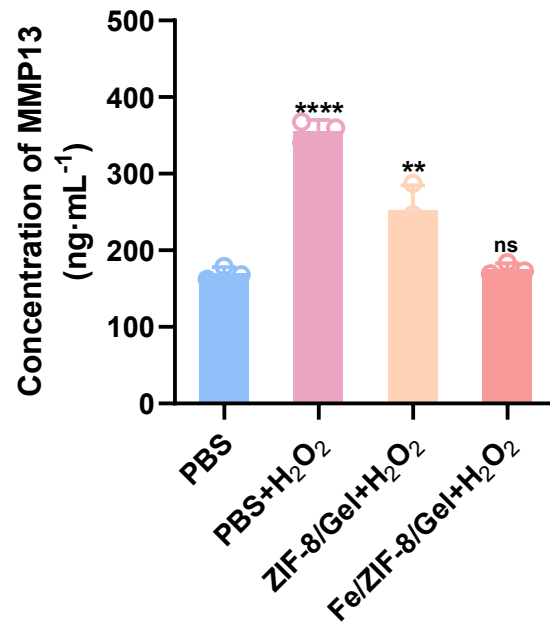

**Fig. S15.** The quantitative analysis of the inflammatory factor MMP13. Data are presented as mean values  $\pm$  SD ( $n = 3$ ).

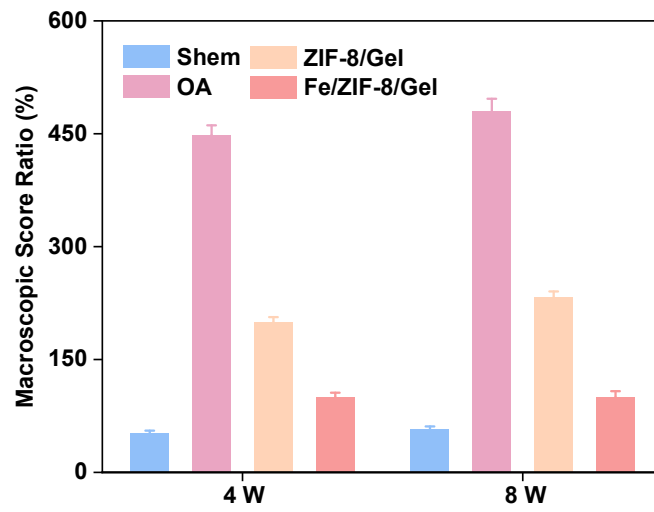

**Fig. S16.** The Macroscopic score Ratios of knee joints harvested from SD rats after 4 weeks and 8 weeks post-corresponding treatments in different groups. Data are presented as mean values  $\pm$  SD (n = 3).

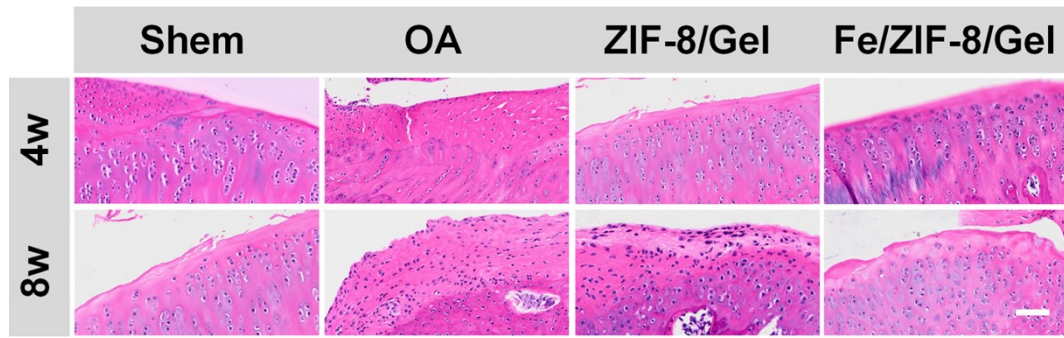

**Fig. S17.** The optical images of the knee joint stained with H&E after 4 and 8 weeks of treatment in different treatment groups. (Scale bar: 100  $\mu\text{m}$ ).

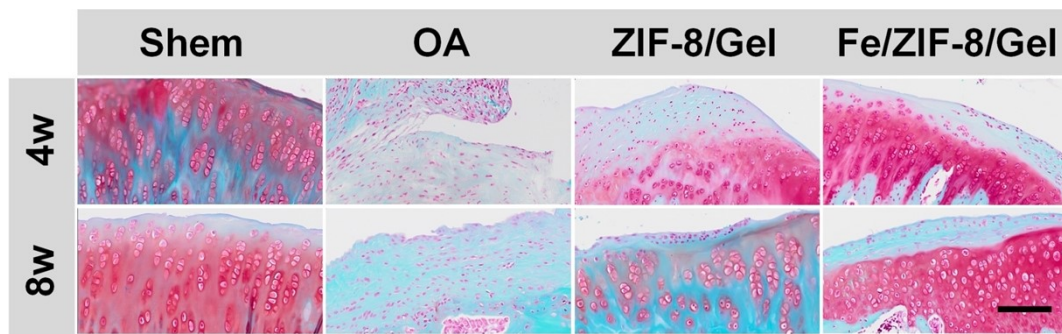

**Fig. S18.** The optical images of the knee joint stained with safranin O/fast green staining after 4 and 8 weeks of treatment in different treatment groups. (Scale bar: 100  $\mu\text{m}$ ).

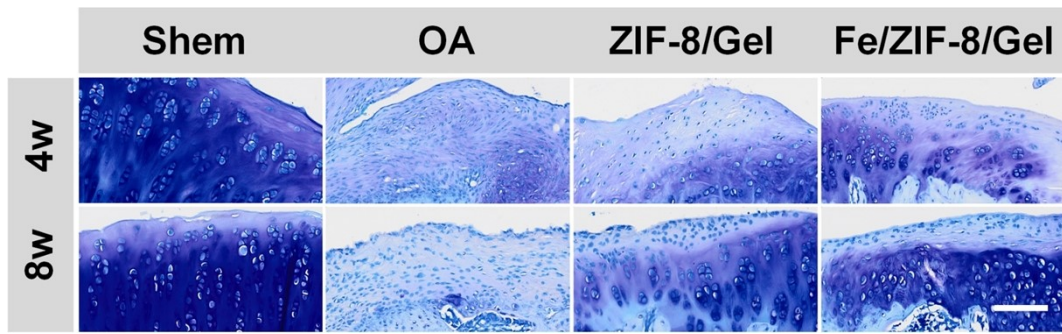

**Fig. S19.** The optical images of the knee joint stained with toluidine blue staining after 4 and 8 weeks of treatment in different treatment groups. (Scale bar: 100  $\mu\text{m}$ ).

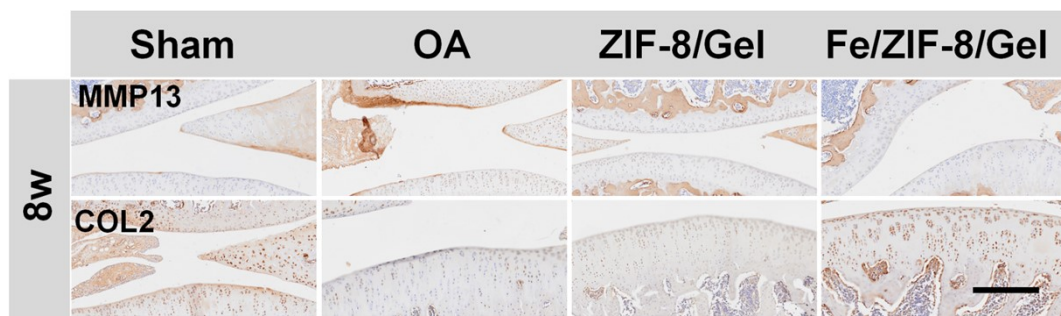

**Fig. S20.** MMP13 and COL2 sections of joint tissues after 8 weeks of treatment in different treatment groups (Scale bar: 50  $\mu$ m). (Scale bar: 100  $\mu$ m).

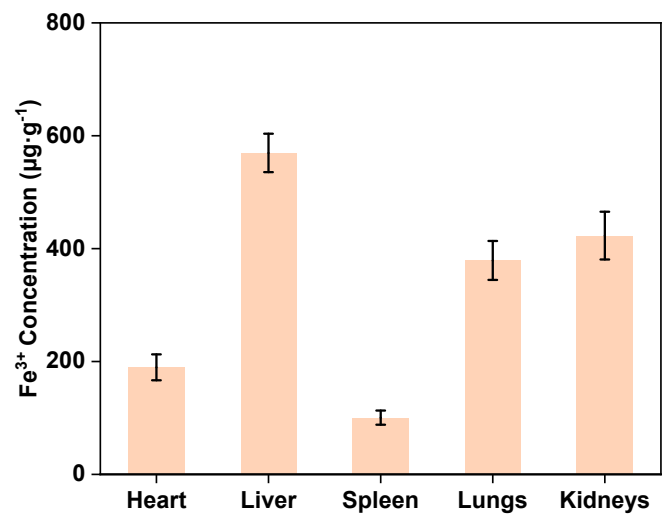

**Fig. S21.** The iron content in different organs of SD rats after 8 weeks of Fe/ZIF-8/Gel treatment.

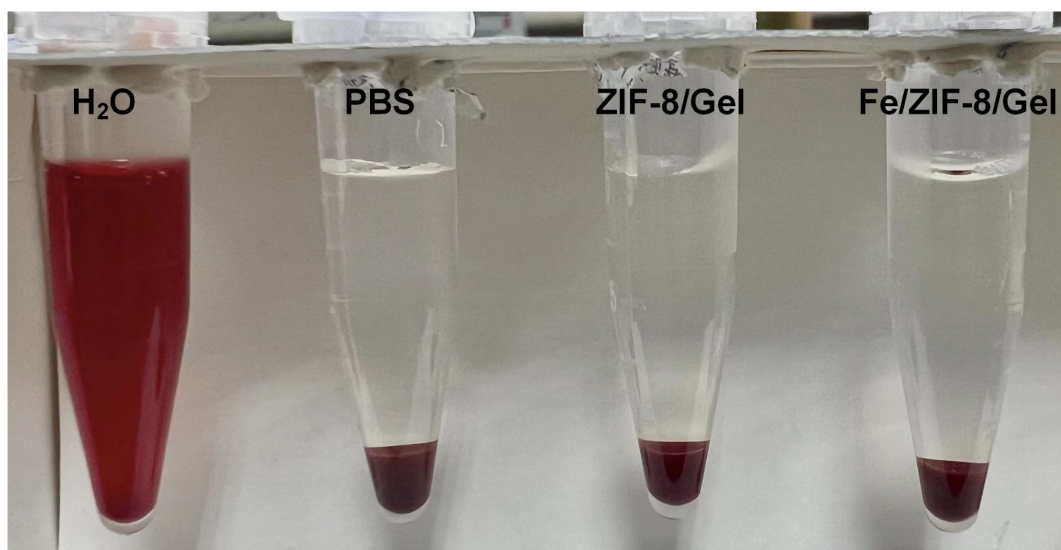

**Fig. S22.** Hemocyte hemolysis assay after the Fe/ZIF-8/Gel nano-enzymatic hydrogel incubation.



**Table S1.** Comparison of this work with the recently reported performance of nano-enzymes in catalyzing the decomposition of H<sub>2</sub>O<sub>2</sub>

| Nanoenzymes                    | Morphology                                                                                         | Substrates                    | Application                           | K <sub>m</sub><br>(mM) | V <sub>max</sub><br>(M s <sup>-1</sup> ) | Refs. |
|--------------------------------|----------------------------------------------------------------------------------------------------|-------------------------------|---------------------------------------|------------------------|------------------------------------------|-------|
| Cu-TCPP-Mn                     | 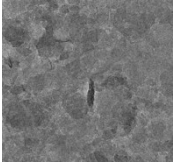<br>Sheet         | H <sub>2</sub> O <sub>2</sub> | Myocardial injury                     | 34.65                  | 0.357                                    | 1     |
| Fh-PVP                         | <br>Particle      | H <sub>2</sub> O <sub>2</sub> | Rheumatoid Arthritis                  | 47.24                  | 6.587                                    | 2     |
| CuAl-LDH                       | <br>Flake        | H <sub>2</sub> O <sub>2</sub> | Cervical cancer cells                 | 12.08                  | 4.446                                    | 3     |
| C-NF                           | <br>Flower-Like | H <sub>2</sub> O <sub>2</sub> | Tumor-bearing                         | 0.31                   | 0.0414                                   | 4     |
| SAuPTB                         | <br>Nanosphere  | H <sub>2</sub> O <sub>2</sub> | Drug-Induced Liver Injury Alleviation | 1.50                   | 0.375                                    | 5     |
| Mn <sub>3</sub> O <sub>4</sub> | <br>Flower-Like | H <sub>2</sub> O <sub>2</sub> | Parkinson's disease                   | 0.196                  | 0.933                                    | 6     |
| MPMP                           | <br>Layered     | H <sub>2</sub> O <sub>2</sub> | OA                                    | 10.61                  | 77.92                                    | 7     |

| Nanoenzymes                       | Morphology                                                                                                | Substrates                        | Application         | $K_m$<br>(mM) | $V_{max}$<br>(M s <sup>-1</sup> ) | Refs.            |
|-----------------------------------|-----------------------------------------------------------------------------------------------------------|-----------------------------------|---------------------|---------------|-----------------------------------|------------------|
| BiPt                              | 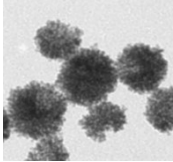<br>Mesoporous           | H <sub>2</sub> O <sub>2</sub>     | Bacterial infection | 0.107         | 7.75                              | 8                |
| Ce-Fe <sub>3</sub> O <sub>4</sub> | <br>Spherical            | H <sub>2</sub> O <sub>2</sub>     | Glucose sensing     | 0.018         | 0.0125                            | 9                |
| Mn <sub>3</sub> O <sub>4</sub>    | <br>Nanosphere           | H <sub>2</sub> O <sub>2</sub>     | OA                  | 0.6           | 0.583                             | 10               |
| <b>Fe/ZIF-8/Gel</b>               | <br><b>Dodecahedral</b> | <b>H<sub>2</sub>O<sub>2</sub></b> | <b>OA</b>           | <b>47.241</b> | <b>6.857</b>                      | <b>This work</b> |

C-NF: ZIF-8-derived carbonized nanofibers; SAuPTB: silica-supported ultrasmall gold nanoparticles-tannic acid hybrid nanozyme; MPMP: MoS<sub>2</sub>-based nanozyme with stepwise modification of Mg<sup>2+</sup>-doped polydopamine and zwitterionic polysulfobetaine.

## References

- 1 K. Xiang, H. Wu, Y. Liu, S. Wang, X. Li, B. Yang, Y. Zhang, L. Ma, G. Lu, L. He, Q. Ni and L. Zhang, *Theranostics*, 2023, **13**, 2721-2733.
- 2 B. Yang and J. Shi, *Nano Lett.*, 2023, **23**, 8355-8362.
- 3 Z. Wang, J. Liu, M. Feng, K. Song, K. Li, W. Liu, S. Guan and Y. Lin, *Chem. Eng. J.*, 2023, **470**, 144020.
- 4 Y. Xing, L. Wang, L. Wang, J. Huang, S. Wang, X. Xie, J. Zhu, T. Ding, K. Cai and J. Zhang, *Adv. Funct. Mater.*, 2022, **32**, 2111171.
- 5 C. Zhou, L. Zhang, Z. Xu, T. Sun, M. Gong, Y. Liu and D. Zhang, *Small*, 2023, **19**, 2206408.
- 6 N. Singh, M. A. Savanur, S. Srivastava, P. D'Silva and G. Muges, *Angew. Chem. Int. Edit.*, 2017, **56**, 14267-14271.
- 7 P. Yu, Y. Li, H. Sun, H. Zhang, H. Kang, P. Wang, Q. Xin, C. Ding, J. Xie and J. Li, *Adv. Mater.*, 2023, **35**, 2303299.
- 8 H. Yao, R. Zhou, J. Wang, Y. Wei, S. Li, Z. Zhang, X. Du, S. Wu and J. Shi, *Adv. Healthc. Mater.*, 2023, **12**, 2300449.
- 9 M. Hosseini, F. Sadat Sabet, H. Khabbaz, M. Aghazadeh, F. Mizani and M. R. Ganjali, *Anal. Methods*, 2017, **9**, 3519-3524.
- 10 W. Wang, J. Duan, W. Ma, B. Xia, F. Liu, Y. Kong, B. Li, H. Zhao, L. Wang, K. Li, Y. Li, X. Lu, Z. Feng, Y. Sang, G. Li, H. Xue, J. Qiu and H. Liu, *Adv. Sci.*, 2023, **10**, 2205859.
